# Supplementary material for: Obesity and diabetes are major risk factors for epicardial adipose tissue inflammation
Source: PubMed Central journal article supplement (PMC8409986; doi:10.1172/jci.insight.145495), 2021-08-23
Supplement: jciinsight-6-145495-s236.pdf [file jciinsight-6-145495-s236.pdf]

## Supplementary material

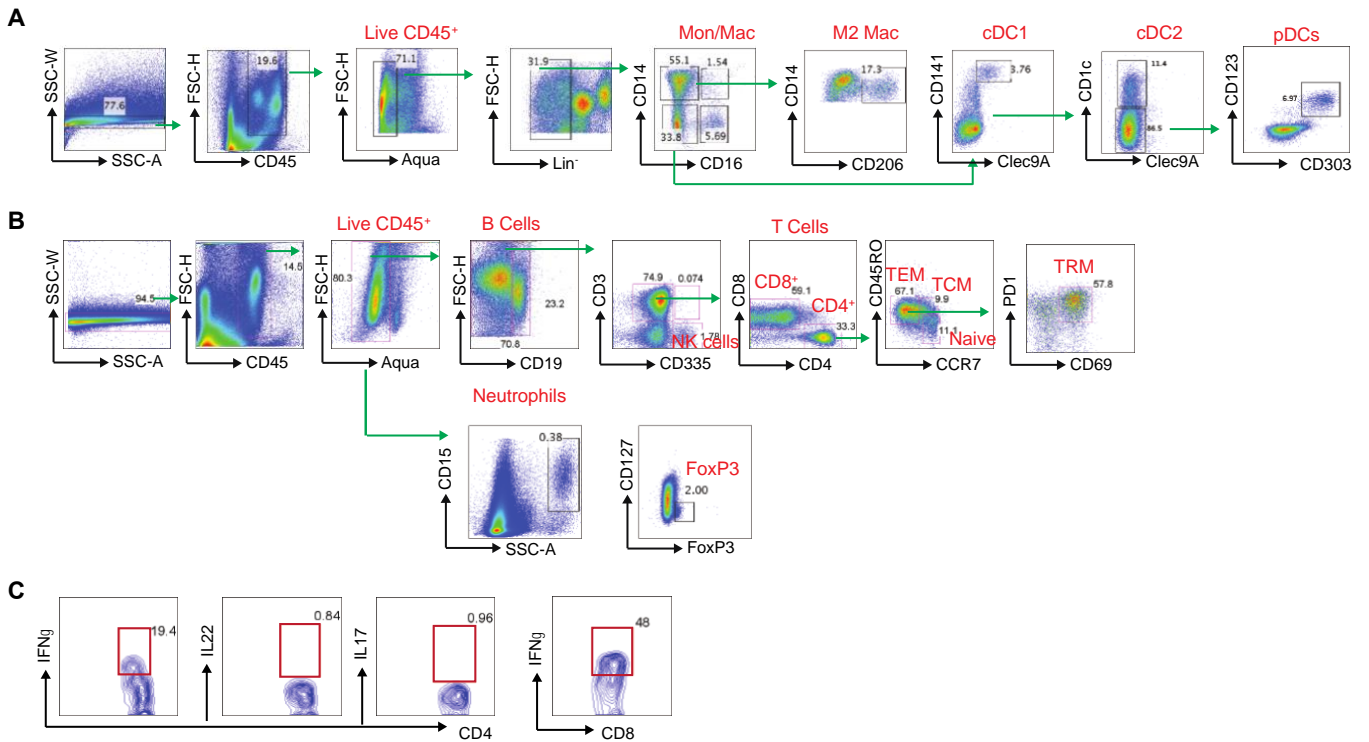

**Supplementary figure 1. Flow cytometry gating strategy and immune phenotyping in blood and adipose tissue.** (A) and (B) Scheme illustrating the gating used for analysis of immune cell populations in EAT. (C) Identification of proportion of cytokines produced by CD4<sup>+</sup> and CD8<sup>+</sup> T cells following T cell stimulation assays. Of note, blood samples are devoid of CD206<sup>+</sup> macrophages and TRM cells.

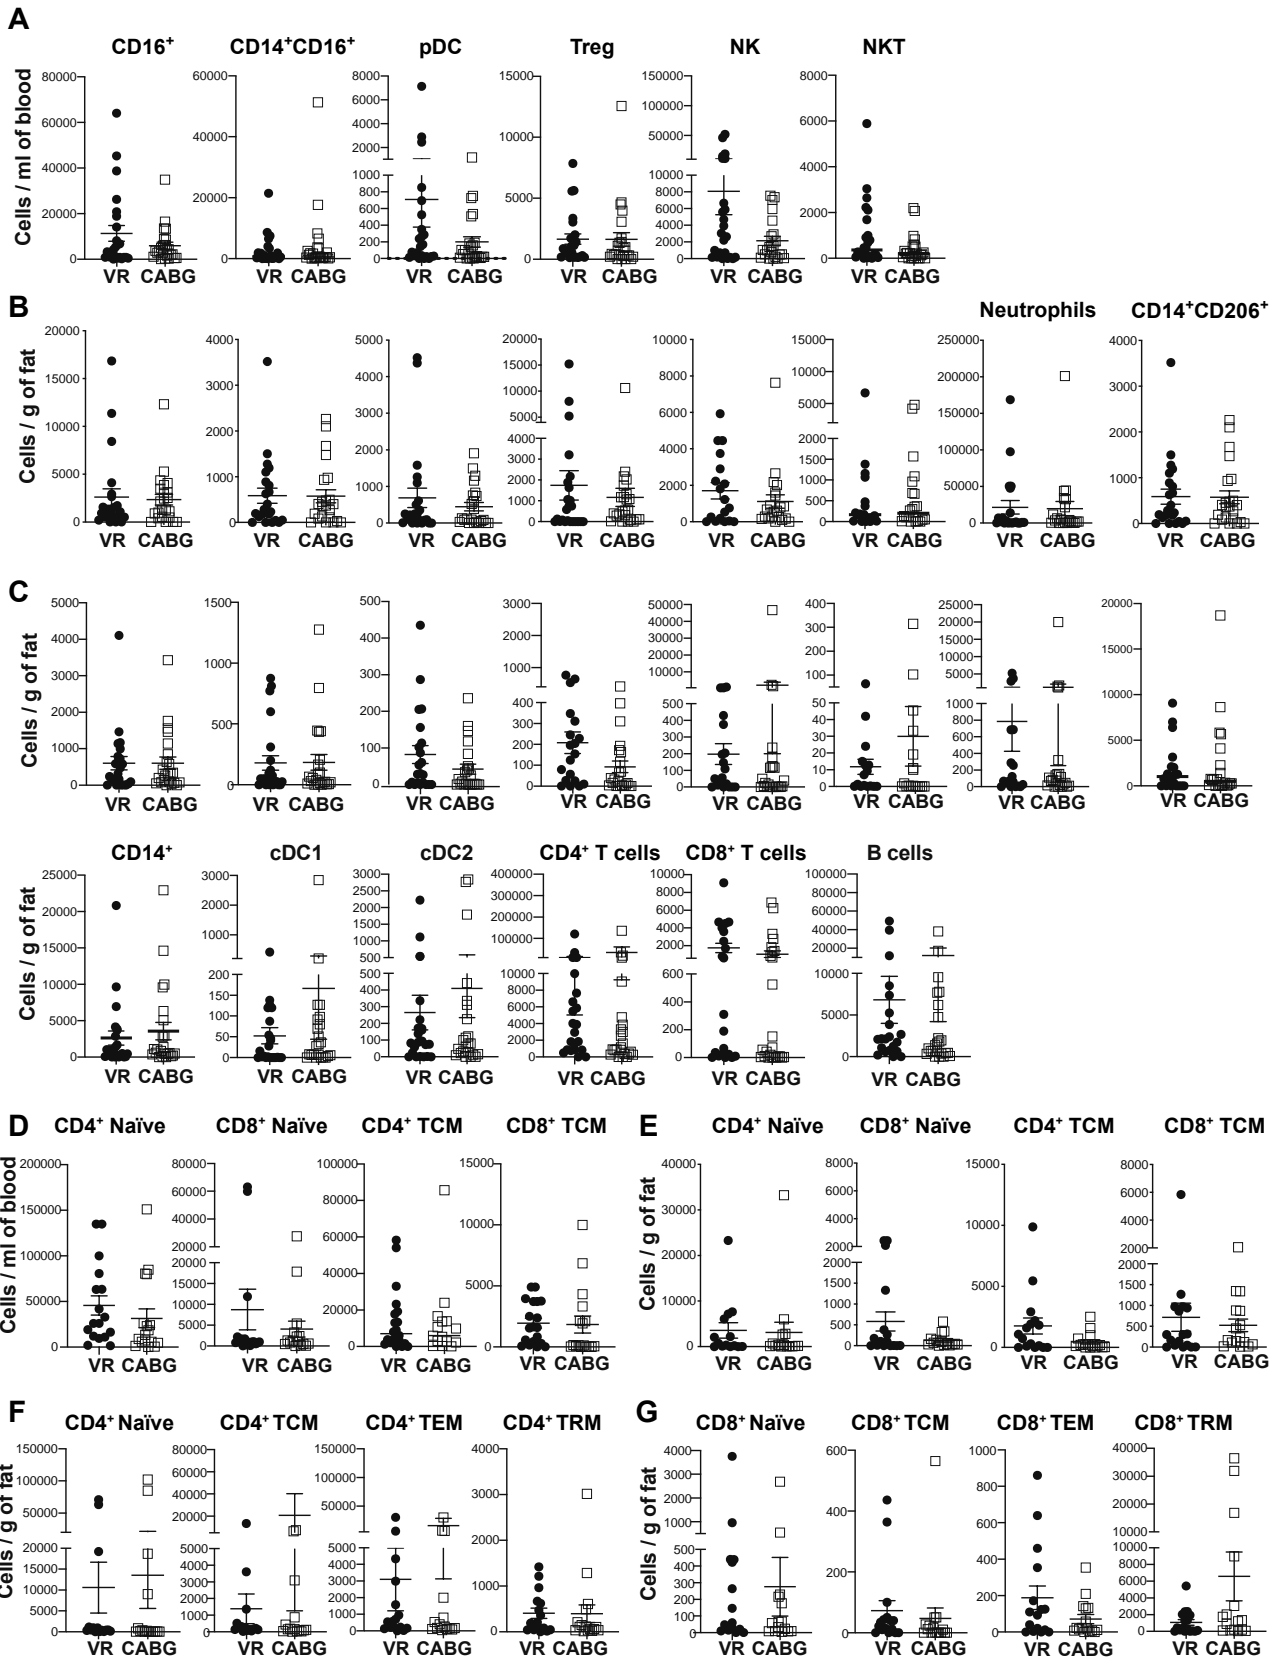

**Supplementary figure 2. Absolute numbers of immune cells in blood, EAT and SAT in CAD and control patients.** Graphs illustrating absolute number of a range of immune cells in CABG and VR surgery patients across blood (A), EAT (B) and SAT (C). Graphs represent T cell subset absolute numbers in blood (D), EAT (E) and SAT (F-G). Statistical significance was determined by Mann-Whitney test, and data represented as median (n=24 patients/ group).

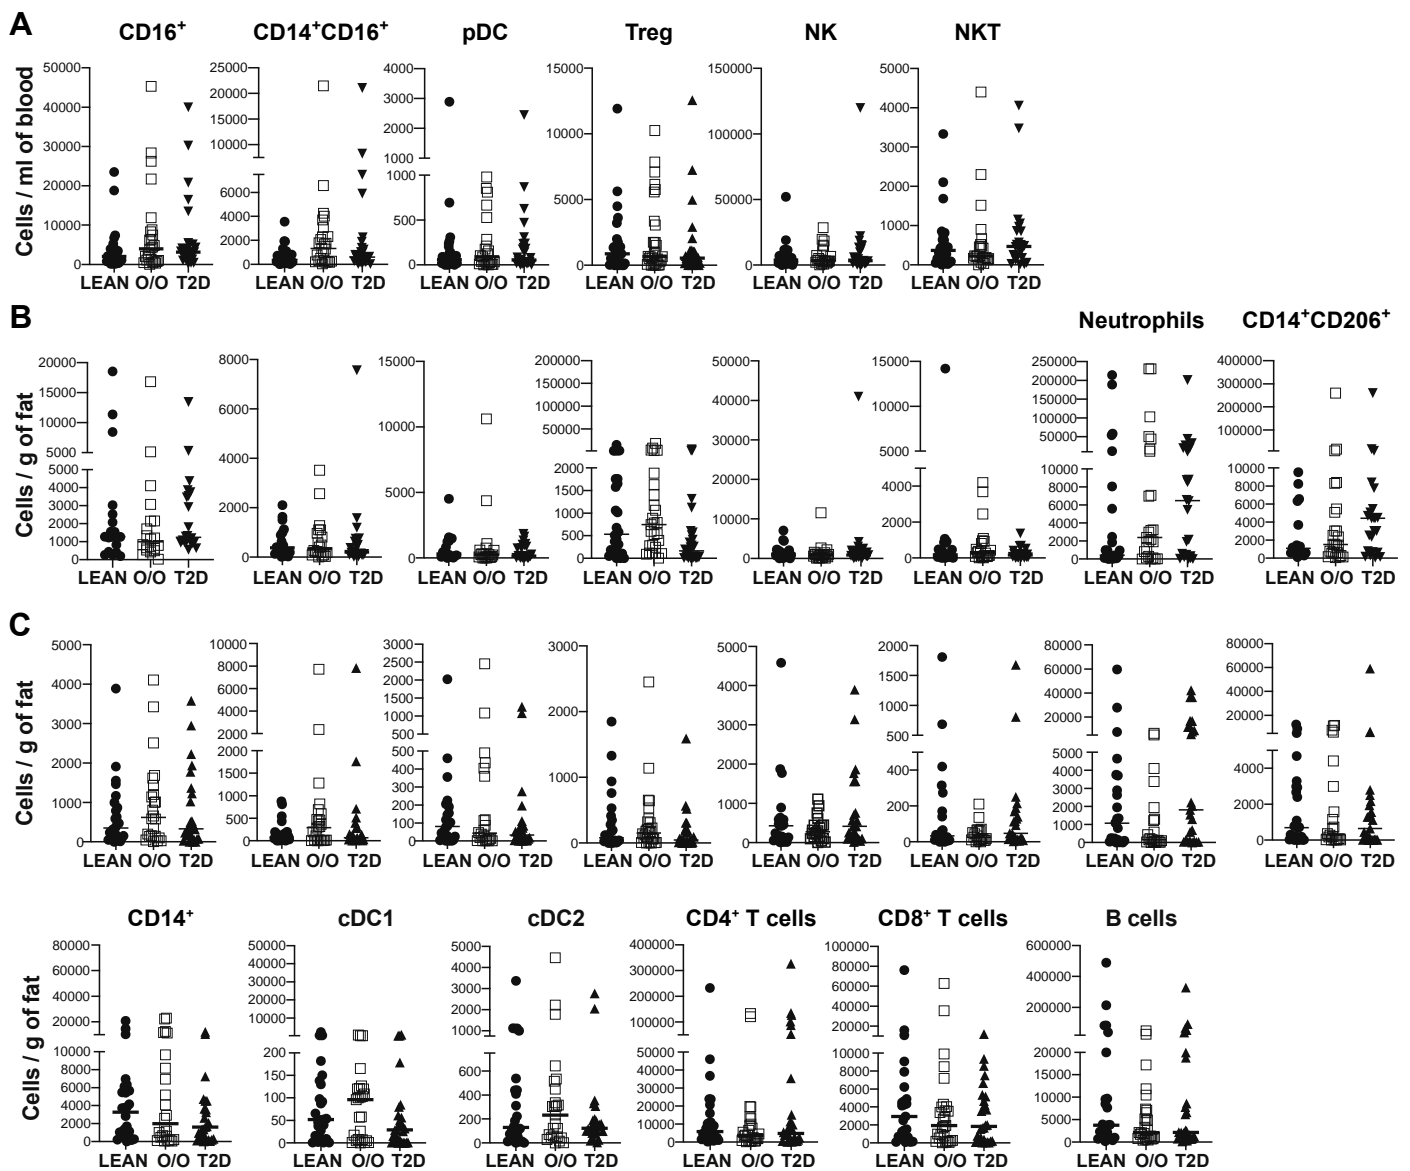

**Supplementary figure 3. Absolute numbers of immune cells in blood, EAT and SAT in Obese/Overweight, T2D and control patients.** Graphs illustrating absolute number of a range of immune cells in overweight/obesity and T2D patients across blood (A), EAT (B), SAT (C). Statistical significance was determined by the Kruskal-Wallis test with Dunn's multiple comparisons post-test correction applied. Data represented as median(n=30 patients/ group).

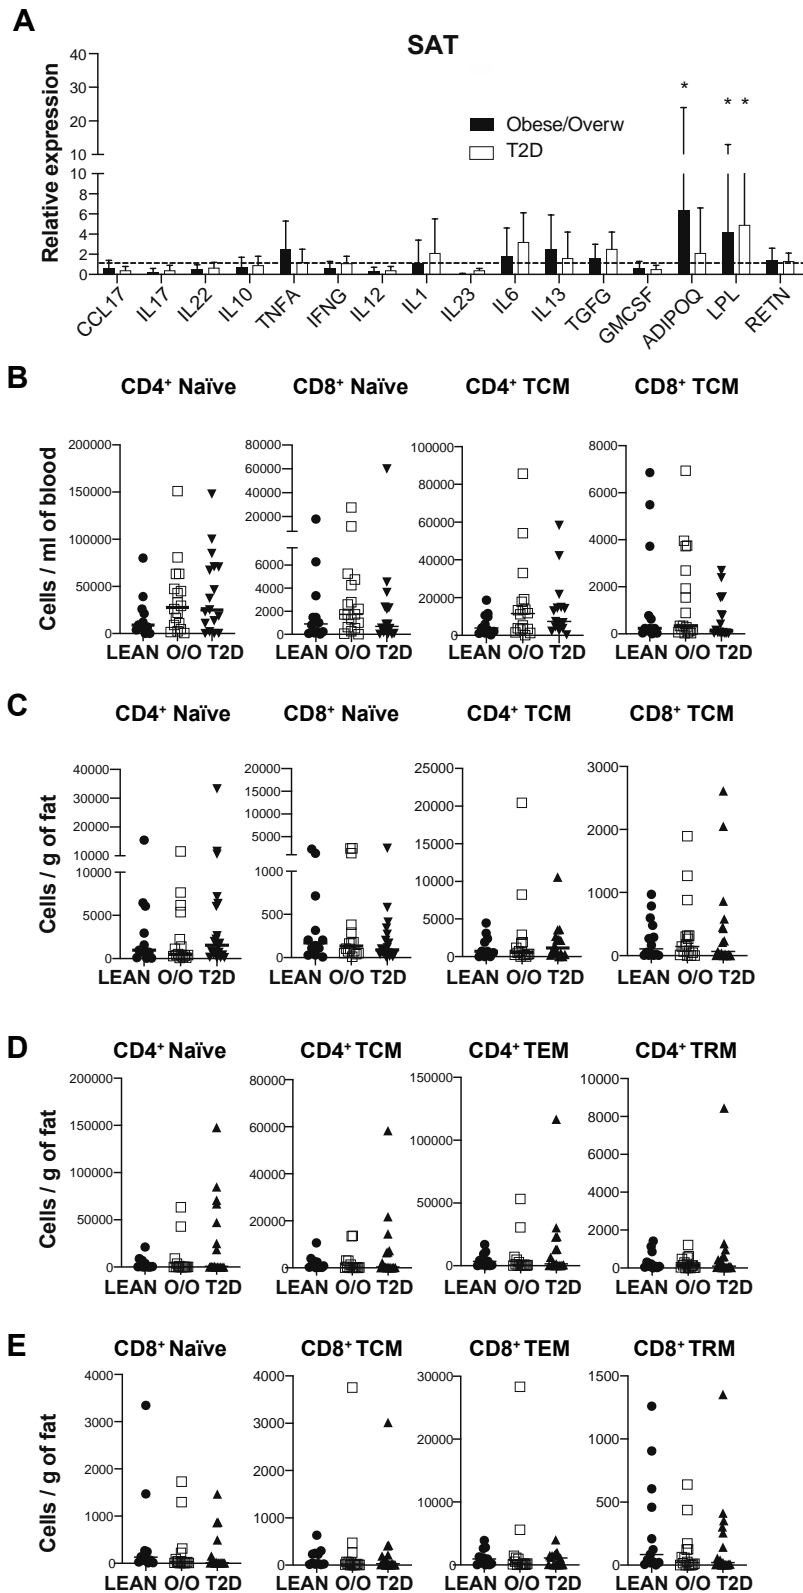

**Supplementary figure 4. Absolute numbers of T cell subsets in blood, EAT and SAT in Obese/Overweight, T2D and control patients.** (A) Relative expression levels of immune mediators in overweight/obesity and T2D patients compared with lean non-diabetic patients in SAT. All gene expression levels normalised against the housekeeping gene GAPDH and control set as 1, indicated with dotted lines. Error bars show the geometric mean. (B-E) Graphs showing T cell subsets in blood (B), EAT (E), and SAT (D-E). Statistical significance was determined by the Kruskal-Wallis Tests with Dunn's multiple comparisons post-test correction applied. Significance denoted as \* $p < 0.05$ ; \*\* $p < 0.005$  and data represented as median ( $n = 30$  patients/group).

**A**

| Variable                                     | Lean non-diabetic (BMI<25) (n=7) | Overweight /obese non-diabetic (BMI≥25) (n=7) | Overweight /obese (BMI≥25) Type 2 diabetic (n=5) | P value |
|----------------------------------------------|----------------------------------|-----------------------------------------------|--------------------------------------------------|---------|
| Age (years)                                  | 63.4 ± 8.9                       | 63.7 ± 8.4                                    | 65 ± 9                                           | 0.87    |
| Body Mass Index (kg/m <sup>2</sup> )         | 22.9 ± 0.9                       | 29.82 ± 1.1                                   | 28.4 ± 2                                         | N/A     |
| Male Gender (%)                              | 5 (71)                           | 6 (85)                                        | 4 (80)                                           | 0.8     |
| Hypertension (%)                             | 4 (57)                           | 3 (43)                                        | 3 (60)                                           | 0.8     |
| Hyperlipidemia (%)                           | 4 (57)                           | 4 (57)                                        | 4 (80)                                           | 0.4     |
| Smoking history (%)                          | 3 (43)                           | 5 (71)                                        | 4 (80)                                           | 0.35    |
| Prior myocardial infarction (%)              | 3 (43)                           | 2 (29)                                        | 2 (40)                                           | 0.84    |
| Left ventricular ejection fraction (%)       | 55.2 (49-60)                     | 50.67 (30-75)                                 | 55 (42-68)                                       | 0.67    |
| Pre-operative use of beta blockers (%)       | 3 (43)                           | 4 (57)                                        | 4 (80)                                           | 0.43    |
| Pre-operative use of ACE inhibitors/ARBs (%) | 3 (43)                           | 5 (71)                                        | 3 (60)                                           | 0.55    |
| Pre-operative use of Aspirin (%)             | 3 (43)                           | 5 (71)                                        | 3 (60)                                           | 0.55    |
| Pre-operative use of Statins (%)             | 3 (43)                           | 5 (71)                                        | 4 (80)                                           | 0.35    |
| CRP (mg/L)                                   | 2 (1-3)                          | 4.4 (1.8-7.2)                                 | 3.5 (1.2-7.7)                                    | 0.12    |
| Neutrophil: lymphocyte ratio                 | 4.4 (3-5.6)                      | 5.1(3.3-7.2)                                  | 3.1 (3.1-5.3)                                    | 0.57    |
| Valve repair/replacement surgery (%)         | 3 (43)                           | 2 (29)                                        | 2 (40)                                           | 0.34    |
| CABG surgery (%)                             | 4 (57)                           | 5 (71)                                        | 3 (60)                                           | 0.34    |

**B**

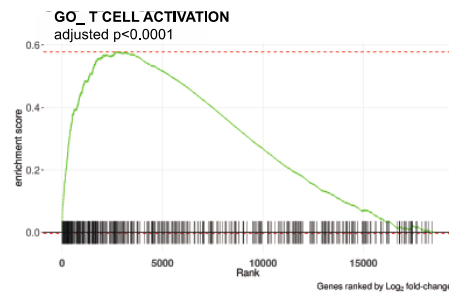

**C**

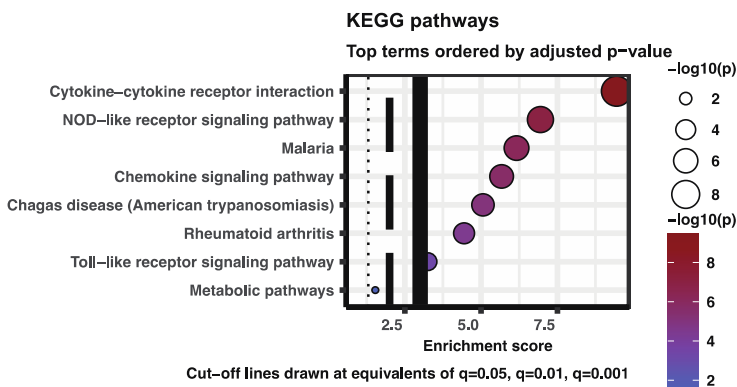

**D**

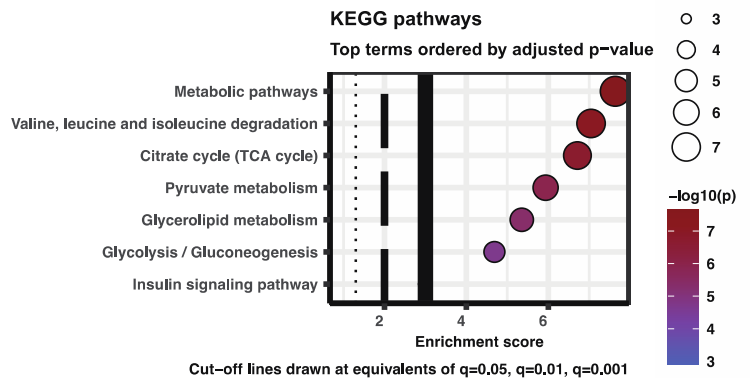

**Supplementary figure 5. Transcriptomic analysis of EAT in lean, overweight/obese and T2D patients.** (A) Clinical characteristic of the study subjects. (B) GSEA data showing positive enrichment of T cell activation signature in EAT from obese compared to lean patients. (C) KEGG pathway enrichment for overweight/obese vs lean EAT. (D) KEGG pathway enrichment for T2D vs lean EAT. Input genes were those passing adjusted  $p < 0.05$ .

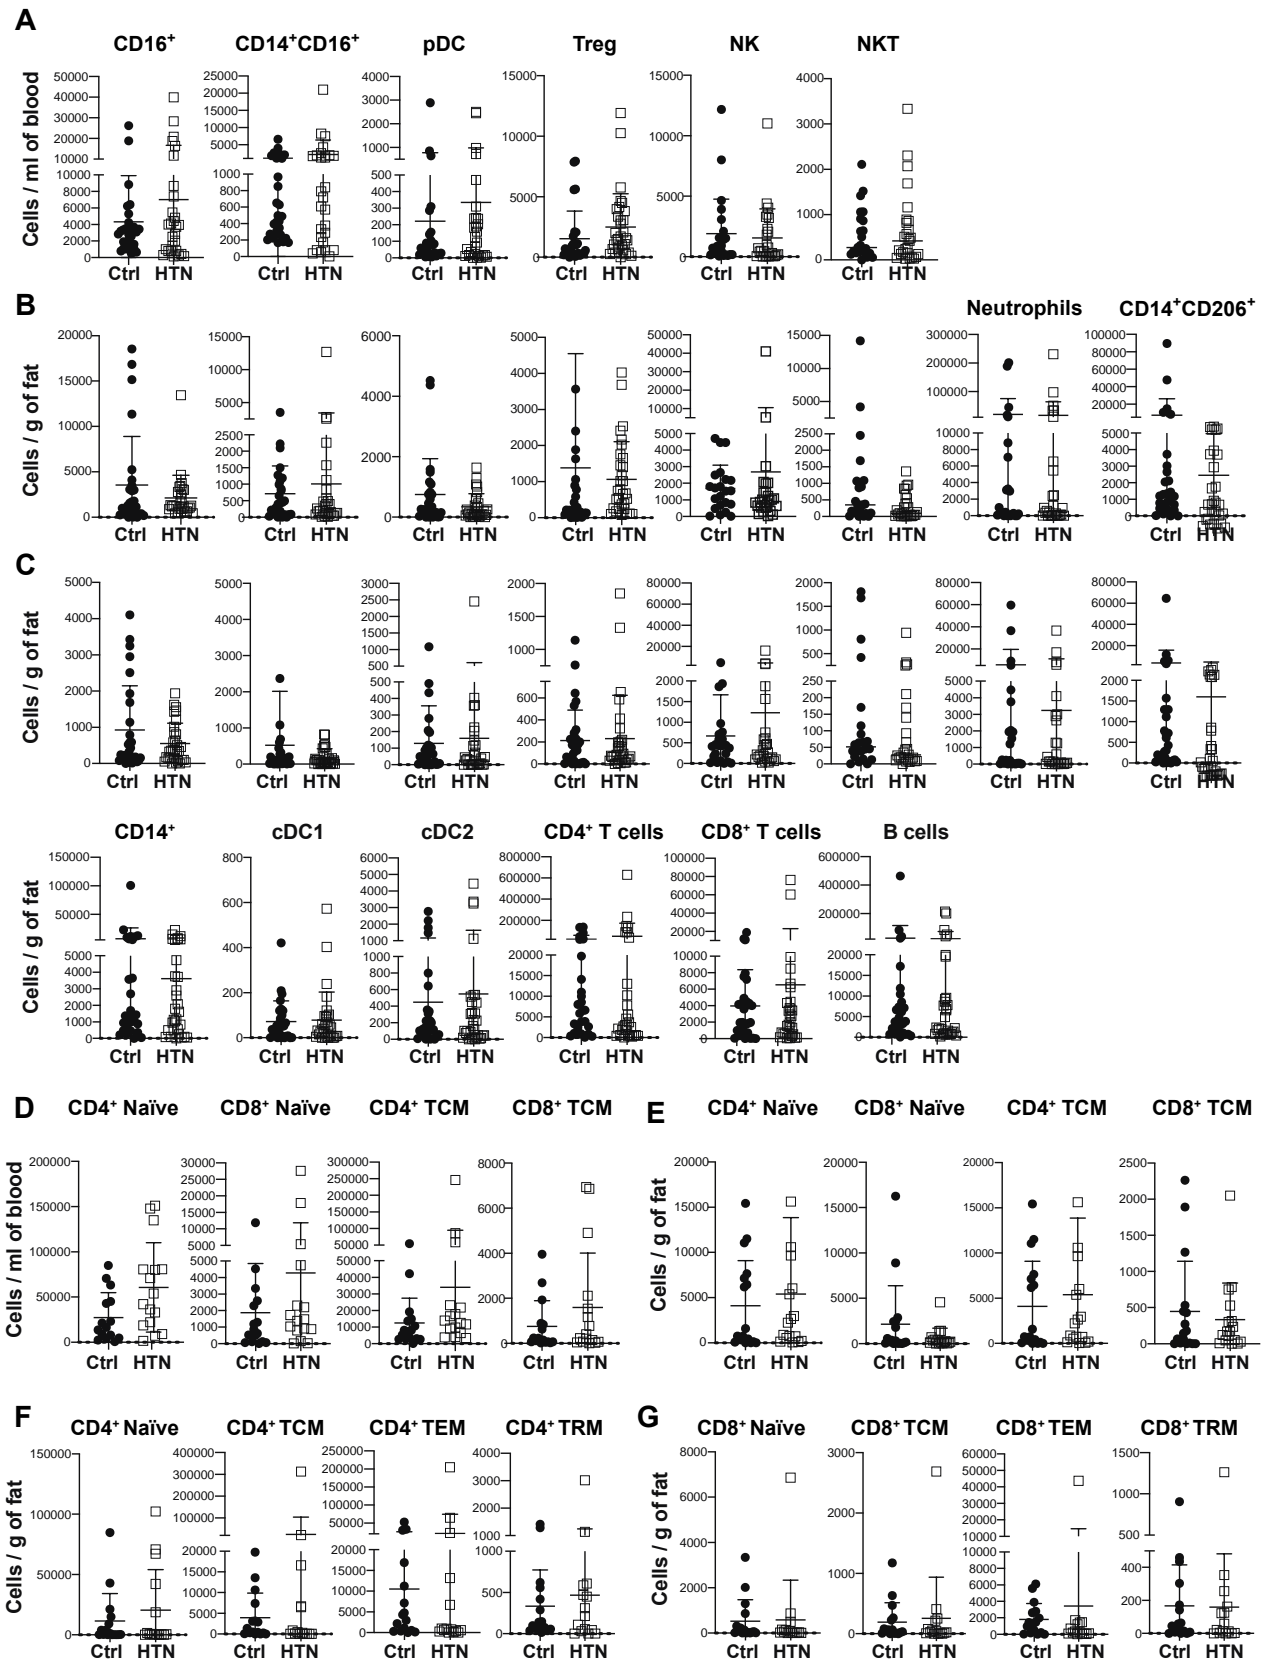

**Supplementary figure 6. Absolute numbers of immune cells in blood, EAT and SAT in hypertensive and control patients.** Graphs illustrating absolute number of a range of immune cells in hypertensive and control non-hypertensive patients across blood (A), EAT (B), SAT (C). Graphs represent T cell subset absolute numbers in blood (D), EAT (E) and SAT (F-G). Statistical significance was determined by Mann-Whitney test, and data represented as median (n=32 patients/ group).

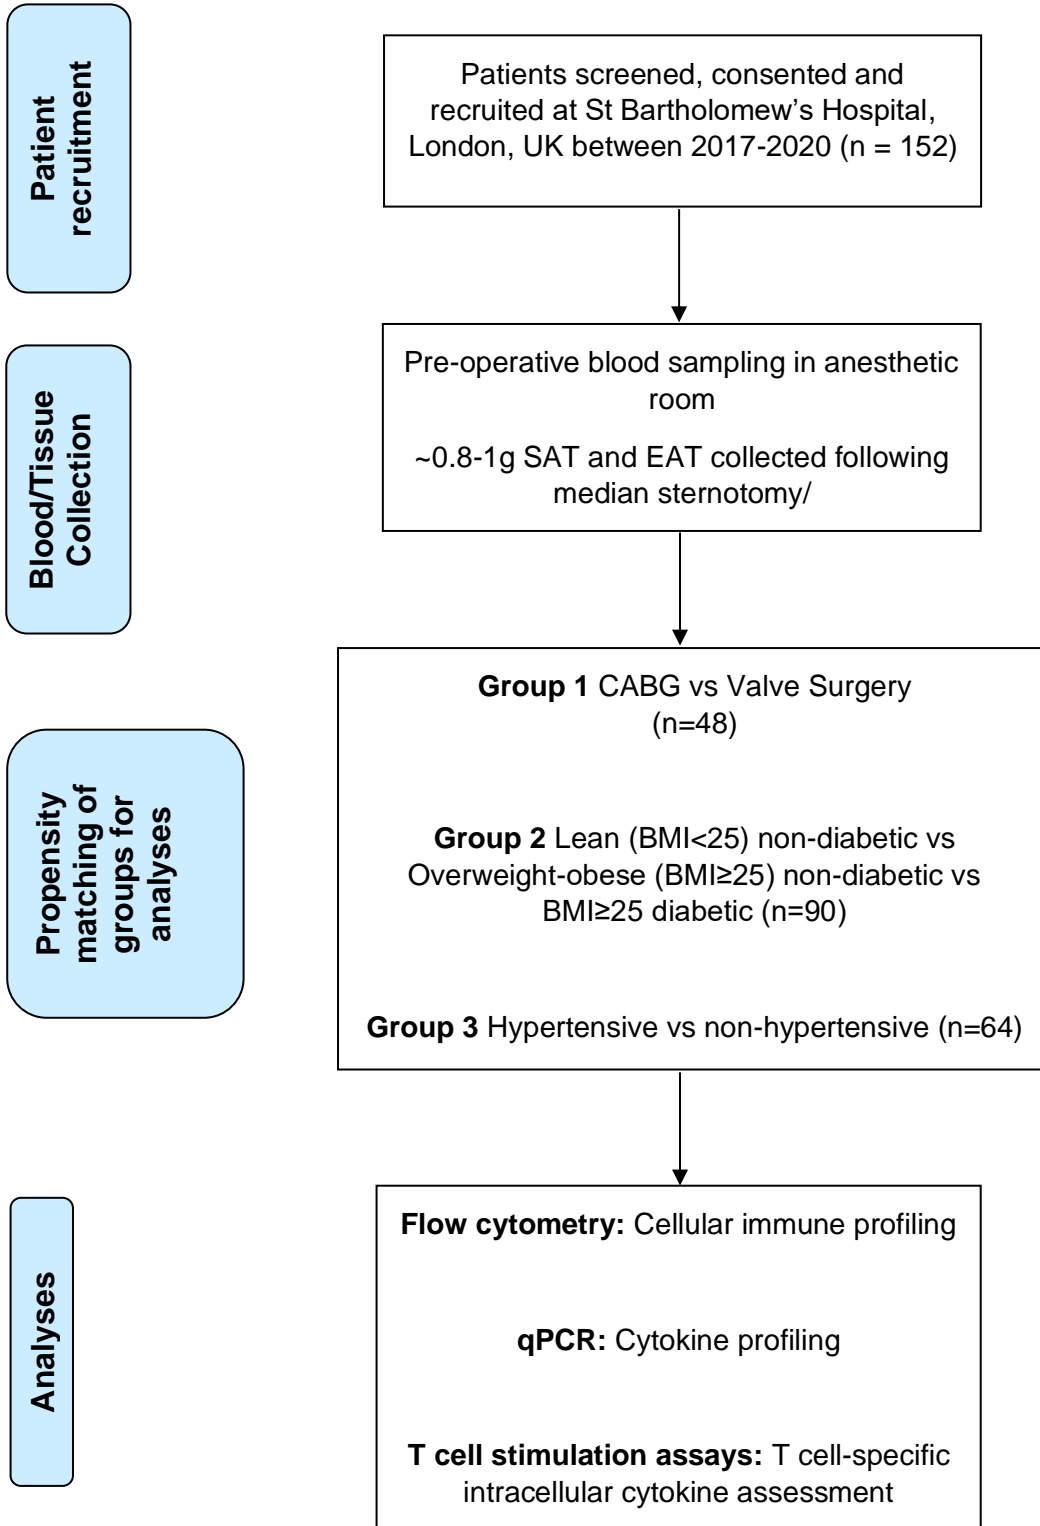

**Supplementary Figure 7**

Outline of the key steps in patient recruitment, sample collection and sample processing.

**Table S1: GSEA enrichment analysis of overweight/obese vs lean EAT**

| <b>Pathway</b>                                          | <b>padj</b> | <b>NES</b> |
|---------------------------------------------------------|-------------|------------|
| GO_MITOCHONDRION                                        | 3.6132E-57  | -2.3107203 |
| HALLMARK_TNFA_SIGNALING_VIA_NFKB                        | 1.9308E-53  | 3.50593859 |
| GAO_LARGE_INTESTINE_24W_C11_PANETH_LIKE_CELL            | 2.3856E-44  | 3.11234783 |
| GO_REGULATION_OF_IMMUNE_SYSTEM_PROCESS                  | 2.3856E-44  | 2.23252554 |
| CUI_DEVELOPING_HEART_C8_MACROPHAGE                      | 4.2675E-42  | 3.12254581 |
| GO_LYMPHOCYTE_ACTIVATION                                | 1.018E-41   | 2.62476859 |
| GO_CELL_ACTIVATION                                      | 1.4317E-41  | 2.22776502 |
| HAY_BONE_MARROW_ERYTHROBLAST                            | 6.8161E-39  | -2.2215223 |
| GO_DEFENSE_RESPONSE                                     | 1.0149E-38  | 2.11106319 |
| GO_MITOCHONDRIAL_MATRIX                                 | 1.1873E-37  | -2.6774137 |
| GSE14769_UNSTIM_VS_40MIN_LPS_BMDM_DN                    | 1.7564E-37  | 3.20574288 |
| HU_FETAL_RETINA_MICROGLIA                               | 1.2845E-36  | 2.84539644 |
| GO_POSITIVE_REGULATION_OF_IMMUNE_SYSTEM_PROCESS         | 2.0917E-36  | 2.32462385 |
| GO_ADAPTIVE_IMMUNE_RESPONSE                             | 3.8576E-36  | 2.79941985 |
| GO_T_CELL_ACTIVATION                                    | 7.4542E-36  | 2.71876369 |
| GSE45365_NK_CELL_VS_CD11B_DC_DN                         | 1.0432E-35  | 3.18099713 |
| GO_OXIDATION_REDUCTION_PROCESS                          | 6.9555E-35  | -2.2552231 |
| BLANCO_MELO_COVID19_SARS_COV_2_INFECTION_CALU3_CELLS_UP | 6.4825E-34  | 2.88989464 |
| GAO_LARGE_INTESTINE_ADULT_CI_MESENCHYMAL_CELLS          | 2.9155E-33  | 2.84877296 |
| NAGASHIMA_NRG1_SIGNALING_UP                             | 2.9155E-33  | 3.16805549 |
| OSWALD_HEMATOPOIETIC_STEM_CELL_IN_COLLAGEN_GEL_UP       | 1.0465E-32  | 3.02278276 |
| GO_REGULATION_OF_CELL_ACTIVATION                        | 1.3839E-32  | 2.53880999 |
| GSE9988_LOW_LPS_VS_CTRL_TREATED_MONOCYTE_UP             | 1.7515E-32  | 3.1476328  |
| GO_MITOCHONDRIAL_ENVELOPE                               | 3.236E-32   | -2.3168602 |
| GSE26343_UNSTIM_VS_LPS_STIM_NFAT5_KO_MACROPHAGE_DN      | 1.576E-31   | 3.08059197 |
| GO_ORGANIC_ACID_METABOLIC_PROCESS                       | 3.2817E-31  | -2.1253722 |
| HALLMARK_INFLAMMATORY_RESPONSE                          | 5.6831E-31  | 3.07542947 |
| GO_REGULATION_OF_IMMUNE_RESPONSE                        | 5.8133E-31  | 2.27744055 |
| GO_RESPIRATORY_ELECTRON_TRANSPORT_CHAIN                 | 8.592E-21   | -2.991854  |
| GO_ATP_METABOLIC_PROCESS                                | 3.5224E-20  | -2.5176772 |
| GSE18791_CTRL_VS_NEWCASTLE_VIRUS_DC_4H_DN               | 7.416E-20   | 2.59654218 |
| GO_LYMPHOCYTE_ACTIVATION                                | 8.2264E-20  | 2.09587163 |
| HP_ABNORMALITY_OF_THE_MITOCHONDRION                     | 9.8343E-20  | -2.847064  |
| HALLMARK_INFLAMMATORY_RESPONSE                          | 3.5919E-19  | 2.5387022  |
| GO_ATP_SYNTHESIS_COUPLED_ELECTRON_TRANSPORT             | 5.1768E-19  | -2.9763119 |
| GO_DEFENSE_RESPONSE                                     | 5.3484E-19  | 1.77097284 |
| GSE9988_LPS_VS_VEHICLE_TREATED_MONOCYTE_UP              | 6.462E-19   | 2.58554257 |
| GSE2706_UNSTIM_VS_2H_LPS_DC_DN                          | 1.3242E-18  | 2.54992217 |
| HP_ABNORMAL_BLOOD_GLUCOSE_CONCENTRATION                 | 2.2501E-18  | -2.6393139 |
| HALLMARK_INTERFERON_GAMMA_RESPONSE                      | 2.3207E-18  | 2.5113997  |
| HALLMARK_ALLOGRAFT_REJECTION                            | 2.3929E-18  | 2.48754546 |
| GO_RESPIRASOME                                          | 3.9054E-18  | -2.9116465 |
| GO_MITOCHONDRIAL_RESPIRATORY_CHAIN_COMPLEX_ASSEMBLY     | 3.9694E-18  | -2.9069677 |
| HP_ABNORMAL_HOMEOSTASIS                                 | 8.444E-21   | 2.58673224 |
| GO_MONOCARBOXYLIC_ACID_CATABOLIC_PROCESS                | 5.9345E-18  | -2.7757817 |
| HP_HYPERTROPHIC_CARDIOMYOPATHY                          | 8.4011E-18  | -2.5415751 |
| HP_ABNORMAL_MYOCARDIUM_MORPHOLOGY                       | 9.2652E-18  | -2.2607369 |
| GO_REGULATION_OF_IMMUNE_SYSTEM_PROCESS                  | 1.3817E-17  | 1.76540132 |
| HP_ABNORMAL_GLUCOSE_HOMEOSTASIS                         | 8.4878E-17  | -2.133751  |
| GO_AEROBIC_RESPIRATION                                  | 3.8066E-16  | -2.9225016 |



**Table S2: GSEA enrichment analysis of T2D vs lean EAT**

| Pathway                                                               | padj       | NES        |
|-----------------------------------------------------------------------|------------|------------|
| GO_MITOCHONDRION                                                      | 1.6673E-70 | -2.4585369 |
| GO_MITOCHONDRIAL_MATRIX                                               | 1.4299E-48 | -2.9891375 |
| GO_OXIDATION_REDUCTION_PROCESS                                        | 3.0143E-47 | -2.4524706 |
| GO_MITOCHONDRIAL_ENVELOPE                                             | 6.6112E-45 | -2.5920861 |
| MOOTHA_HUMAN_MITODB_6_2002                                            | 8.2146E-43 | -2.9248399 |
| GO_ORGANELLE_INNER_MEMBRANE                                           | 5.9224E-42 | -2.8050888 |
| MOOTHA_MITOCHONDRIA                                                   | 3.9681E-39 | -2.8174517 |
| REACTOME_THE_CITRIC_ACID_TCA_CYCLE_AND_RESPIRATORY_ELECTRON_TRANSPORT | 6.5374E-39 | -3.3203305 |
| GO_MITOCHONDRIAL_PROTEIN_COMPLEX                                      | 2.6116E-37 | -3.0811668 |
| GO_ORGANIC_ACID_METABOLIC_PROCESS                                     | 1.2407E-36 | -2.2251642 |
| HALLMARK_OXIDATIVE_PHOSPHORYLATION                                    | 5.1294E-36 | -3.21005   |
| BURTON_ADIPOGENESIS_6                                                 | 1.6857E-34 | -3.1758217 |
| GO_GENERATION_OF_PRECURSOR_METABOLITES_AND_ENERGY                     | 2.0208E-34 | -2.666748  |
| GO_OXIDOREDUCTASE_ACTIVITY                                            | 4.0734E-34 | -2.4204263 |
| HALLMARK_TNFA_SIGNALING_VIA_NFKB                                      | 5.82E-33   | 2.89606303 |
| HP_ABNORMALITY_OF_ACID_BASE_HOMEOSTASIS                               | 1.3976E-32 | -2.852456  |
| HALLMARK_ADIPOGENESIS                                                 | 2.4573E-28 | -3.0147195 |
| GO_CELLULAR_RESPIRATION                                               | 6.7767E-27 | -3.0237665 |
| GO_ORGANIC_ACID_CATABOLIC_PROCESS                                     | 9.4681E-27 | -2.7980869 |
| GO_FATTY_ACID_METABOLIC_PROCESS                                       | 5.1519E-25 | -2.5956071 |
| KEGG_OXIDATIVE_PHOSPHORYLATION                                        | 5.5198E-25 | -3.0954535 |
| GO_INNER_MITOCHONDRIAL_MEMBRANE_PROTEIN_COMPLEX                       | 2.128E-24  | -3.0057297 |
| HP_INCREASED_SERUM_LACTATE                                            | 6.1315E-24 | -2.9589805 |
| GO_SMALL_MOLECULE_CATABOLIC_PROCESS                                   | 1.4956E-23 | -2.4178529 |
| REACTOME_RESPIRATORY_ELECTRON_TRANSPORT                               | 1.4956E-23 | -3.1065141 |
| GO_ELECTRON_TRANSPORT_CHAIN                                           | 1.7887E-23 | -2.8907852 |
| GSE9988_LOW_LPS_VS_VEHICLE_TREATED_MONOCYTE_UP                        | 3.6551E-23 | 2.70148961 |
| GO_ENERGY_DERIVATION_BY_OXIDATION_OF_ORGANIC_COMPOUNDS                | 4.4333E-23 | -2.6907153 |
| GSE2706_UNSTIM_VS_2H_LPS_AND_R848_DC_DN                               | 5.9935E-22 | 2.67143762 |
| GSE2706_UNSTIM_VS_2H_R848_DC_DN                                       | 7.3963E-22 | 2.65248151 |
| GSE9988_ANTI_TREM1_AND_LPS_VS_CTRL_TREATED_MONOCYTES_UP               | 2.4552E-21 | 2.6474521  |
| GSE14769_UNSTIM_VS_60MIN_LPS_BMDM_DN                                  | 8.444E-21  | 2.58673224 |
| GO_RESPIRATORY_ELECTRON_TRANSPORT_CHAIN                               | 8.592E-21  | -2.991854  |
| GO_ATP_METABOLIC_PROCESS                                              | 3.5224E-20 | -2.5176772 |
| GO_LYMPHOCYTE_ACTIVATION                                              | 8.2264E-20 | 2.09587163 |
| HP_ABNORMALITY_OF_THE_MITOCHONDRION                                   | 9.8343E-20 | -2.847064  |
| HALLMARK_INFLAMMATORY_RESPONSE                                        | 3.5919E-19 | 2.5387022  |
| GO_DEFENSE_RESPONSE                                                   | 5.3484E-19 | 1.77097284 |
| GSE9988_LPS_VS_VEHICLE_TREATED_MONOCYTE_UP                            | 6.462E-19  | 2.58554257 |
| GSE2706_UNSTIM_VS_2H_LPS_DC_DN                                        | 1.3242E-18 | 2.54992217 |
| HALLMARK_INTERFERON_GAMMA_RESPONSE                                    | 2.3207E-18 | 2.5113997  |
| HALLMARK_ALLOGRAFT_REJECTION                                          | 2.3929E-18 | 2.48754546 |
| GO_RESPIRASOME                                                        | 3.9054E-18 | -2.9116465 |
| HP_ABNORMAL_HOMEOSTASIS                                               | 4.38E-18   | -1.8054708 |
| HP_HYPERTROPHIC_CARDIOMYOPATHY                                        | 8.4011E-18 | -2.5415751 |
| HP_ABNORMAL_MYOCARDIUM_MORPHOLOGY                                     | 9.2652E-18 | -2.2607369 |
| GO_REGULATION_OF_IMMUNE_SYSTEM_PROCESS                                | 1.3817E-17 | 1.76540132 |
| GO_T_CELL_ACTIVATION                                                  | 1.5212E-17 | 2.17751458 |
| ZHOU_INFLAMMATORY_RESPONSE_LIVE_UP                                    | 2.4537E-17 | 2.23776561 |
| GO_ADAPTIVE_IMMUNE_RESPONSE                                           | 2.6258E-16 | 2.2037809  |

**Table S3: Antibodies used**

| <b>Reagent</b>                | <b>Source</b> | <b>Catalog Number</b> | <b>Dilution</b> |
|-------------------------------|---------------|-----------------------|-----------------|
| Anti-human CD197-FITC         | Biologend     | 353216                | 1:200           |
| Anti-human CD19-PerCP-Cy5.5   | Biologend     | 302228                | 1:200           |
| Anti-human CD45RO-BV421       | Biologend     | 304224                | 1:200           |
| Anti-human CD335-BV605        | Biologend     | 331926                | 1:200           |
| Anti-human CD45-BV785         | Biologend     | 304048                | 1:200           |
| Anti-human CD127-APC          | Biologend     | 351342                | 1:500           |
| Anti-human CD8-AF700          | Biologend     | 300920                | 1:500           |
| Anti-human CD3-APC/Cy7        | Biologend     | 300318                | 1:200           |
| Anti-human CD69-PE            | Biologend     | 310906                | 1:200           |
| Anti-human FOXP3-PE CF594     | Biologend     | 320126                | 1:200           |
| Anti-human CD4-PE/Cy7         | Biologend     | 357410                | 1:200           |
| Anti-human CD303-FITC         | Biologend     | 354208                | 1:200           |
| Anti-human CD123-PerCP/Cy5.5  | Biologend     | 306016                | 1:200           |
| Anti-human CD206-BV421        | Biologend     | 321126                | 1:200           |
| Anti-human CD3-BV605          | Biologend     | 317322                | 1:200           |
| Anti-human CD15-BV605         | Biologend     | 323032                | 1:200           |
| Anti-human CD19-BV605         | Biologend     | 302244                | 1:200           |
| Anti-human CD14-APC           | Biologend     | 325608                | 1:200           |
| Anti-human CD16-AF700         | Biologend     | 302026                | 1:500           |
| Anti-human CD1c-APC/Cy7       | Biologend     | 331520                | 1:200           |
| Anti-human Clec9A-PE          | Biologend     | 353804                | 1:200           |
| Anti-human CD1a-PE CF594      | Biologend     | 300132                | 1:200           |
| Anti-human CD141-PE/Cy7       | Biologend     | 344110                | 1:200           |
| Anti-human IFN- $\gamma$ -APC | Biologend     | 502511                | 1:200           |
| Anti-human IL-17-APC/Cy7      | Biologend     | 512319                | 1:200           |
| Anti-human IL-22-PE           | Biologend     | 366703                | 1:200           |

**Table S4: List of primers for RT-PCR**

| <b>Primer</b> | <b>Forward sequence (5' to 3')</b> | <b>Reverse sequence (5' to 3')</b> |
|---------------|------------------------------------|------------------------------------|
| <i>GAPDH</i>  | GGCTCATGACCACAGTCCA                | CACATTGGGGGTAGGAACAC               |
| <i>IL1</i>    | AGCTACGAATCTCCGACCAC               | CGTTATCCCATGTGTCTGAAGAA            |
| <i>IL6</i>    | ACTCACCTCTTCAGAACGAATTG            | CCATCTTTGGAAGGTTTCAGGTTG           |
| <i>IL10</i>   | GACTTTAAGGGTTACCTGGGTTG            | TCACATGCGCCTTGATGTCTG              |
| <i>IL12</i>   | CTCCTGGACCACCTCAGTTTG              | CGGTCATCTGCCGCAA                   |
| <i>IL13</i>   | TGCAGCCCTGGAATCCCT                 | CCCAGCTGAGACCTTGTGC                |
| <i>IL17</i>   | AACCGATCCACCTCACCTTG               | TCTCTTGCTGGATGGGGACA               |
| <i>IL22</i>   | GCTTGACAAGTCCAACCTTCCA             | GCTCACTCATACTGACTCCGTG             |
| <i>IL23</i>   | GCTTCAAAATCCTTCGCAG                | TATCTGAGTGCCATCCTTGAG              |
| <i>GMCSF</i>  | CATGTGAATGCCATCCAGGA               | CAGGCCACATTCTCTCACTT               |
| <i>CCL17</i>  | CTTCAAGGGAGCCATTCCCC               | CTCTTGTTGTTGGGGTCCGA               |
| <i>IFNG</i>   | TCGTTTTGGGTTCTCTTGGCT              | CCTGTTTTAGCTGCTGGCGA               |
| <i>TNFA</i>   | GTGACAAGCCTGTAGCCCAT               | CAGACTCGGCAAAGTCGAGA               |
| <i>TGFB</i>   | CGGCAGCTGTACATTGACTT               | TCCAAATGTAGGGGCAGGG                |
| <i>ADIPOQ</i> | AGGAAACCACGACTCAAGGG               | CTCCGGTTTCACCGATGTCT               |
| <i>LPL</i>    | TCACACACGCAGTCAGTCTC               | GAGGTTCTCCAGGTCGTTGG               |
| <i>RETN</i>   | TGAAAGCTCTCTGTCTCCTCC              | TCCTGGATCCTCTCATTGATGG             |
